# Supplementary material for: Sociodemographic and Health Characteristics, Rather Than Primary Care Supply, are Major Drivers of Geographic Variation in Preventable Hospitalizations in Australia
Source: PubMed Central journal article supplement — Med Care. 2015 Apr 23;53(5):436–45. doi: 10.1097/MLR.0000000000000342 (PMC4396734; doi:10.1097/mlr.0000000000000342), 2015-04-23

**Supplementary Table 1: Conditions included in the Australian 2012 National Healthcare Agreement preventable hospitalisation indicator**

| Category                                     | ICD-10-AM diagnosis and procedure codes                                                                                                                                                                                                                                                                                                                                                                                                                                                                                                                                                                                                                                                                                                                                                                                              |
|----------------------------------------------|--------------------------------------------------------------------------------------------------------------------------------------------------------------------------------------------------------------------------------------------------------------------------------------------------------------------------------------------------------------------------------------------------------------------------------------------------------------------------------------------------------------------------------------------------------------------------------------------------------------------------------------------------------------------------------------------------------------------------------------------------------------------------------------------------------------------------------------|
| <b>Chronic</b>                               |                                                                                                                                                                                                                                                                                                                                                                                                                                                                                                                                                                                                                                                                                                                                                                                                                                      |
| Angina                                       | I20, I24.0, I24.8, I24.9 as principal diagnosis only, exclude cases with procedure codes not in blocks [1820] to [2016]                                                                                                                                                                                                                                                                                                                                                                                                                                                                                                                                                                                                                                                                                                              |
| Asthma                                       | J45, J46 as principal diagnosis only                                                                                                                                                                                                                                                                                                                                                                                                                                                                                                                                                                                                                                                                                                                                                                                                 |
| Chronic obstructive pulmonary disease (COPD) | J20, J41, J42, J43, J44, J47 as principal diagnosis only, J20 only with additional diagnoses of J41, J42, J43, J44, J47                                                                                                                                                                                                                                                                                                                                                                                                                                                                                                                                                                                                                                                                                                              |
| Congestive cardiac failure                   | I50, I11.0, J81 as principal diagnosis only, exclude cases with the following procedure codes: 33172-00, 35304-00, 35305-00, 35310-02, 35310-00, 38281-11, 38281-07, 38278-01, 38278-00, 38281-02, 38281-01, 38281-00, 38256-00, 38278-03, 38284-00, 38284-02, 38521-09, 38270-01, 38456-19, 38456-15, 38456-12, 38456-11, 38456-10, 38456-07, 38456-01, 38470-00, 38475-00, 38480-02, 38480-01, 38480-00, 38488-06, 38488-04, 38489-04, 38488-02, 38489-03, 38487-00, 38489-02, 38488-00, 38489-00, 38490-00, 38493-00, 38497-04, 38497-03, 38497-02, 38497-01, 38497-00, 38500-00, 38503-00, 38505-00, 38521-04, 38606-00, 38612-00, 38615-00, 38653-00, 38700-02, 38700-00, 38739-00, 38742-02, 38742-00, 38745-00, 38751-02, 38751-00, 38757-02, 38757-01, 38757-00, 90204-00, 90205-00, 90219-00, 90224-00, 90214-00, 90214-02. |
| Diabetes complications                       | E10–E14.9 as principal diagnoses, and E10–E14.9 as additional diagnoses where the principal diagnosis was: hypersmolarity (E87.0), acidosis (E87.2), transient ischaemic attack (G45), nerve disorders and neuropathies (G50–G64), cataracts and lens disorders (H25–H28), retinal disorders (H30–H36), glaucoma (H40–H42), myocardial infarction (I21–I22), other coronary heart diseases (I20, I23–I25), heart failure (I50), stroke and sequelae (I60–I64, I69.0–I69.4), peripheral vascular disease (I70–I74), gingivitis and periodontal disease (K05), kidney diseases including end-stage renal disease (N00–N29), and renal dialysis (Z49)                                                                                                                                                                                   |
| Hypertension                                 | I10, I11.9 as principal diagnosis only, exclude cases with procedure codes according to the list of procedures excluded from the Congestive cardiac failure category above.                                                                                                                                                                                                                                                                                                                                                                                                                                                                                                                                                                                                                                                          |
| Iron deficiency anaemia                      | D50.1, D50.8, D50.9 as principal diagnosis only.                                                                                                                                                                                                                                                                                                                                                                                                                                                                                                                                                                                                                                                                                                                                                                                     |
| Nutritional deficiencies                     | E40, E41, E42, E43, E55.0, E64.3 as principal diagnosis only.                                                                                                                                                                                                                                                                                                                                                                                                                                                                                                                                                                                                                                                                                                                                                                        |
| Rheumatic heart disease                      | I00 to I09 as principal diagnosis only. (Note: includes acute rheumatic fever)                                                                                                                                                                                                                                                                                                                                                                                                                                                                                                                                                                                                                                                                                                                                                       |
| <b>Acute</b>                                 |                                                                                                                                                                                                                                                                                                                                                                                                                                                                                                                                                                                                                                                                                                                                                                                                                                      |
| Appendicitis with generalised peritonitis    | K35.0 in any diagnosis field                                                                                                                                                                                                                                                                                                                                                                                                                                                                                                                                                                                                                                                                                                                                                                                                         |
| Cellulitis                                   | L03, L04, L08, L88, L98.0, L98.3 as principal diagnosis only, exclude cases with any procedure except those in blocks 1820 to 2016 or if procedure is 30216-02, 30676-00, 30223-02, 30064-00, 34527-01, 34527-00, 90661-00 and this is the only listed procedure                                                                                                                                                                                                                                                                                                                                                                                                                                                                                                                                                                     |
| Convulsions and epilepsy                     | G40, G41, O15, R56 as principal diagnosis only                                                                                                                                                                                                                                                                                                                                                                                                                                                                                                                                                                                                                                                                                                                                                                                       |
| Dehydration and gastroenteritis              | A09.9, E86, K52.2, K52.8, K52.9 as principal diagnosis only.                                                                                                                                                                                                                                                                                                                                                                                                                                                                                                                                                                                                                                                                                                                                                                         |
| Dental conditions                            | K02, K03, K04, K05, K06, K08, K09.8, K09.9, K12, K13 as principal diagnosis only.                                                                                                                                                                                                                                                                                                                                                                                                                                                                                                                                                                                                                                                                                                                                                    |
| Ear, nose and throat infections              | H66, H67, J02, J03, J06, J31.2 as principal diagnosis only.                                                                                                                                                                                                                                                                                                                                                                                                                                                                                                                                                                                                                                                                                                                                                                          |
| Gangrene                                     | R02 in any diagnosis field                                                                                                                                                                                                                                                                                                                                                                                                                                                                                                                                                                                                                                                                                                                                                                                                           |
| Pelvic inflammatory disease                  | N70, N73, N74 as principal diagnosis only.                                                                                                                                                                                                                                                                                                                                                                                                                                                                                                                                                                                                                                                                                                                                                                                           |
| Perforated/bleeding ulcer                    | K25.0, K25.1, K25.2, K25.4, K25.5, K25.6, K26.0, K26.1, K26.2, K26.4, K26.5, K26.6, K27.0, K27.1, K27.2, K27.4, K27.5, K27.6, K28.0, K28.1, K28.2, K28.4, K28.5, K28.6 as principal diagnosis only.                                                                                                                                                                                                                                                                                                                                                                                                                                                                                                                                                                                                                                  |
| Pyelonephritis                               | N10, N11, N12, N13.6, N39.0 as principal diagnosis only.                                                                                                                                                                                                                                                                                                                                                                                                                                                                                                                                                                                                                                                                                                                                                                             |
| <b>Vaccine-preventable</b>                   |                                                                                                                                                                                                                                                                                                                                                                                                                                                                                                                                                                                                                                                                                                                                                                                                                                      |
| Influenza and pneumonia                      | J10, J11, J13, J14, J15.3, J15.4, J15.7, J15.9, J16.8, J18.1, J18.8 in any diagnosis field, excludes cases with additional diagnosis of D57 (sickle-cell disorders) and people under 2 months                                                                                                                                                                                                                                                                                                                                                                                                                                                                                                                                                                                                                                        |
| Other vaccine-preventable conditions         | A35, A36, A37, A80, B05, B06, B16.1, B16.9, B18.0, B18.1, B26, G00.0, M01.4 in any diagnosis field                                                                                                                                                                                                                                                                                                                                                                                                                                                                                                                                                                                                                                                                                                                                   |

**Supplementary Figure 1: Distribution of: (a) density of full time workload equivalent (FWE) general practitioners (GPs) per 10,000 residents across Statistical Local Areas (SLAs) in NSW. (b) Remoteness categories across SLAs in NSW, using remoteness categories from the Accessibility/Remoteness Index of Australia (ARIA+).**

(a) Quintiles of the density of full time workload equivalent GPs per 10,000 residents

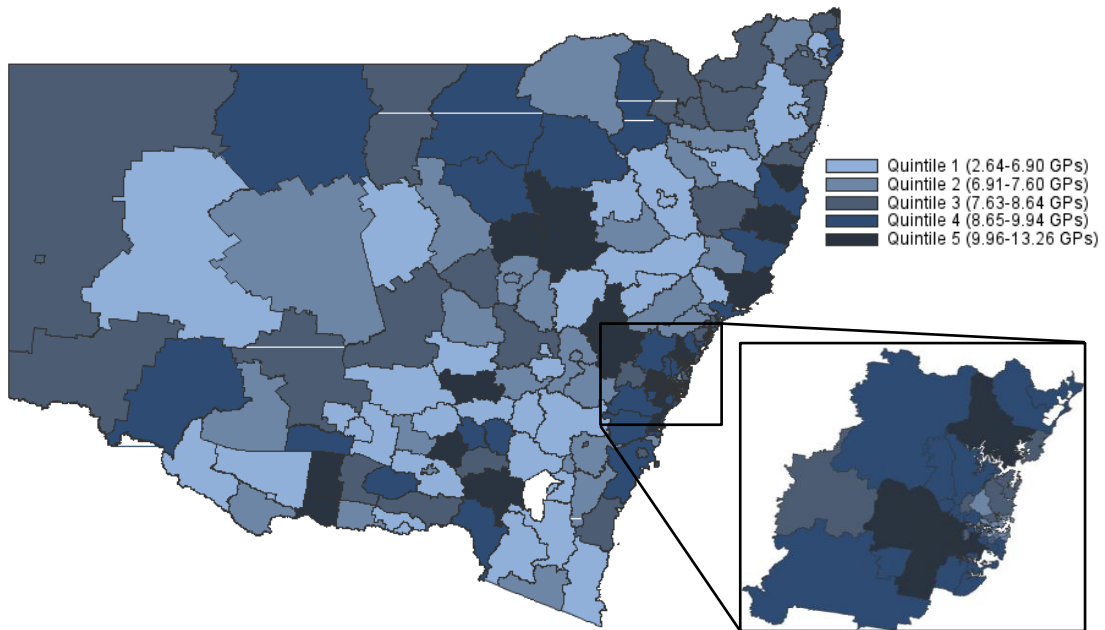

(b) Remoteness of area (ARIA+)

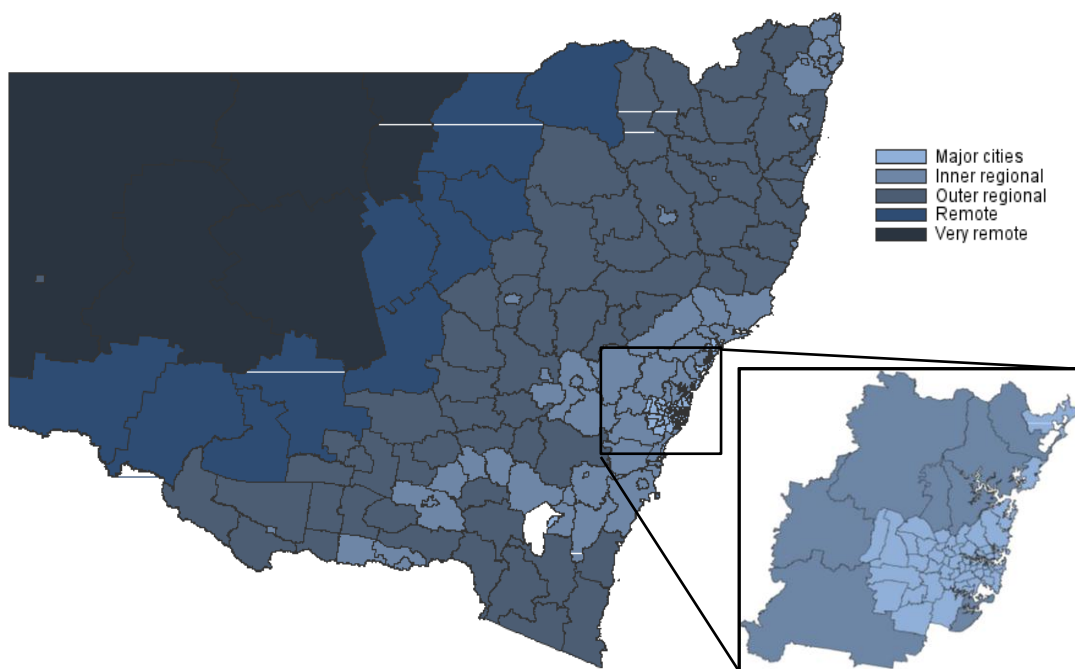

**Supplementary Figure 2: Number of admissions and incidence rate ratios (IRRs) for person-level predictors of any preventable hospitalisation, in multilevel Poisson models simultaneously adjusted for all person-level variables and area-level quintiles of full time workload equivalent GPs**

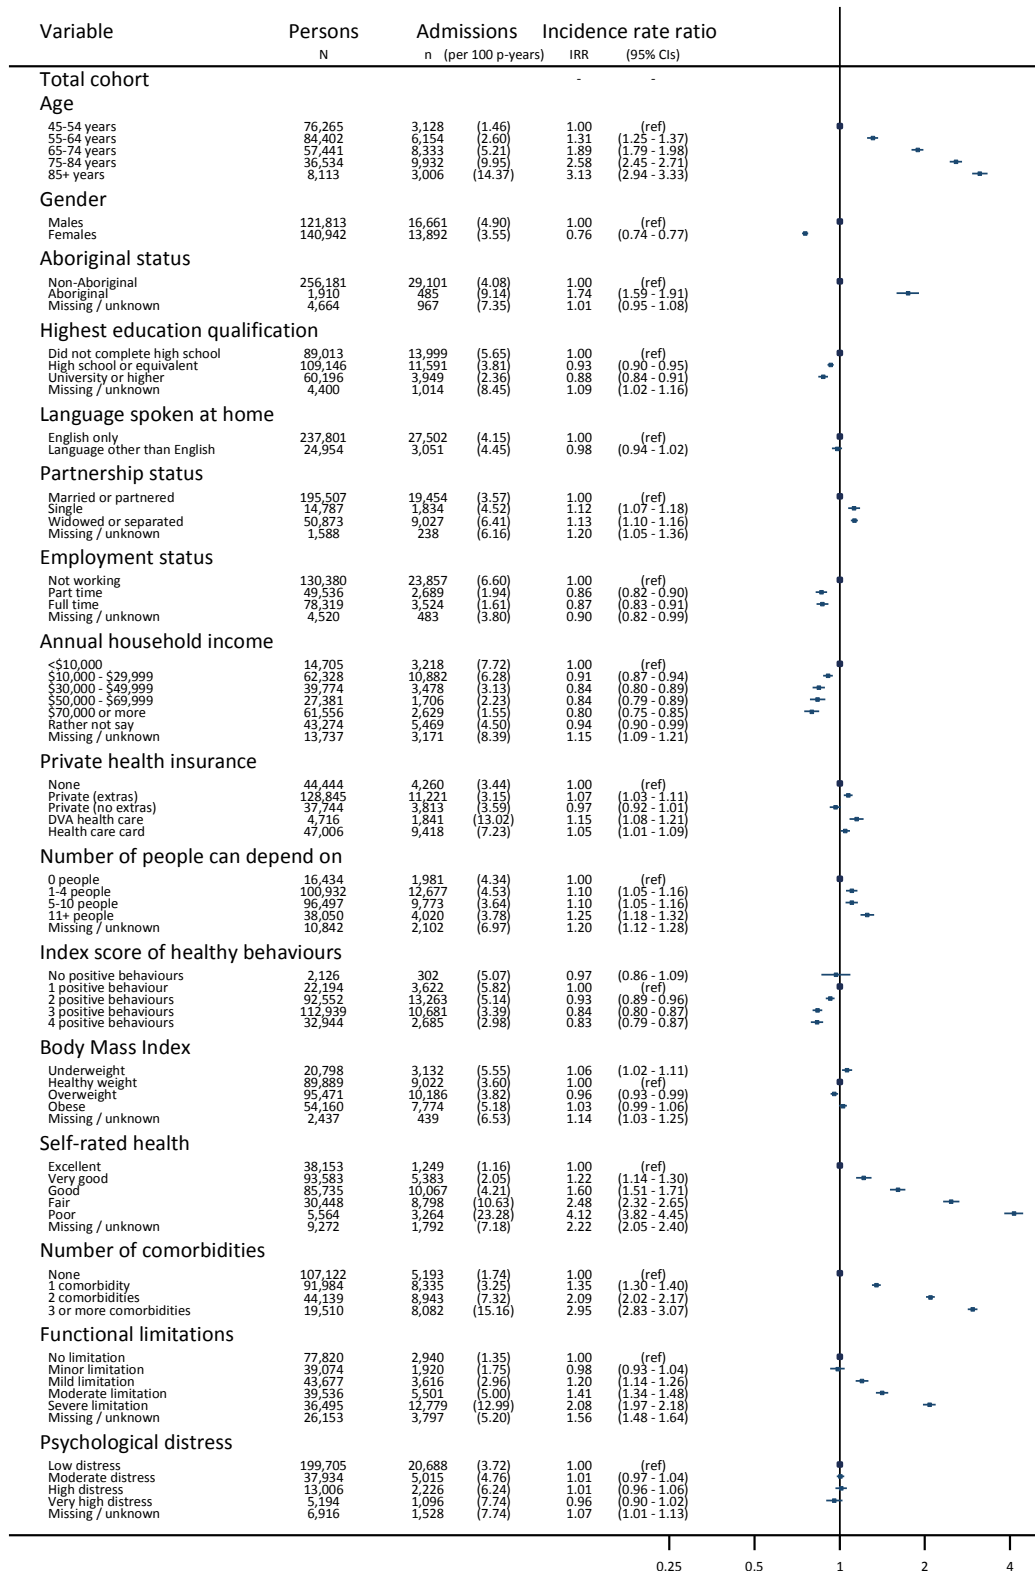

**Supplementary Figure 3: Number of admissions and incidence rate ratios (IRRs) for person-level predictors of chronic preventable hospitalisations, in multilevel Poisson models simultaneously adjusted for all person-level variables and area-level quintiles of full time workload equivalent GPs**

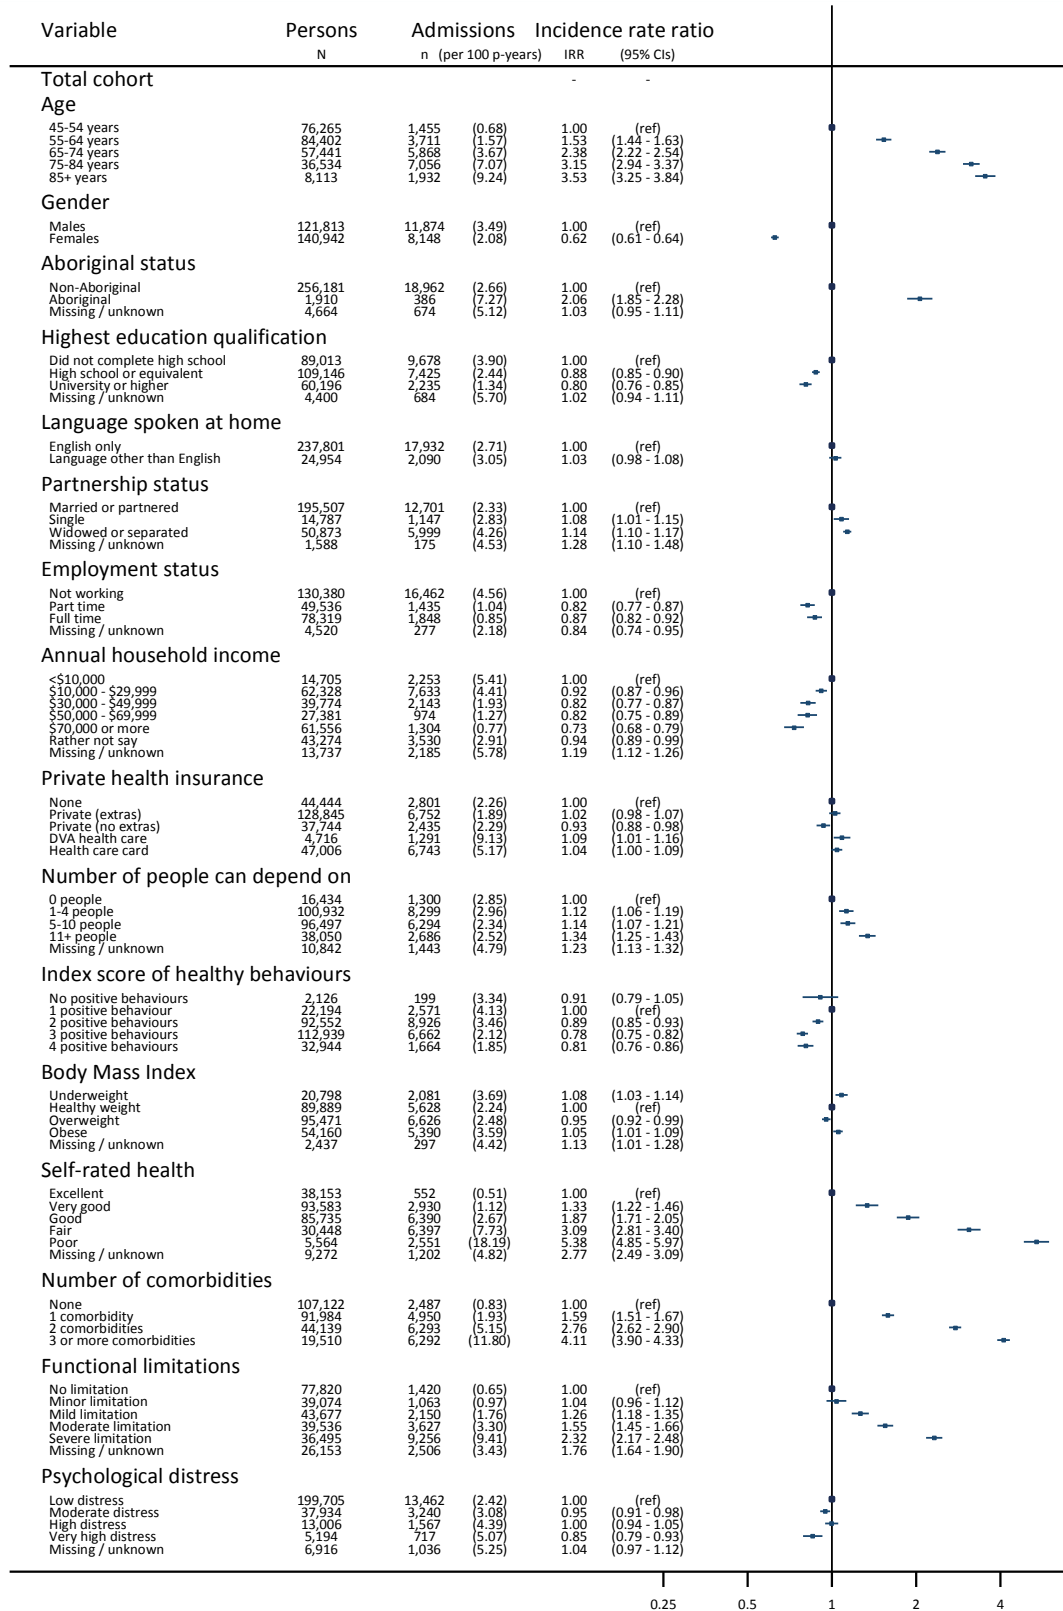

**Supplementary Figure 4: Number of admissions and incidence rate ratios (IRRs) for person-level predictors of acute preventable hospitalisations, in multilevel Poisson models simultaneously adjusted for all person-level variables and area-level quintiles of full time workload equivalent GPs**

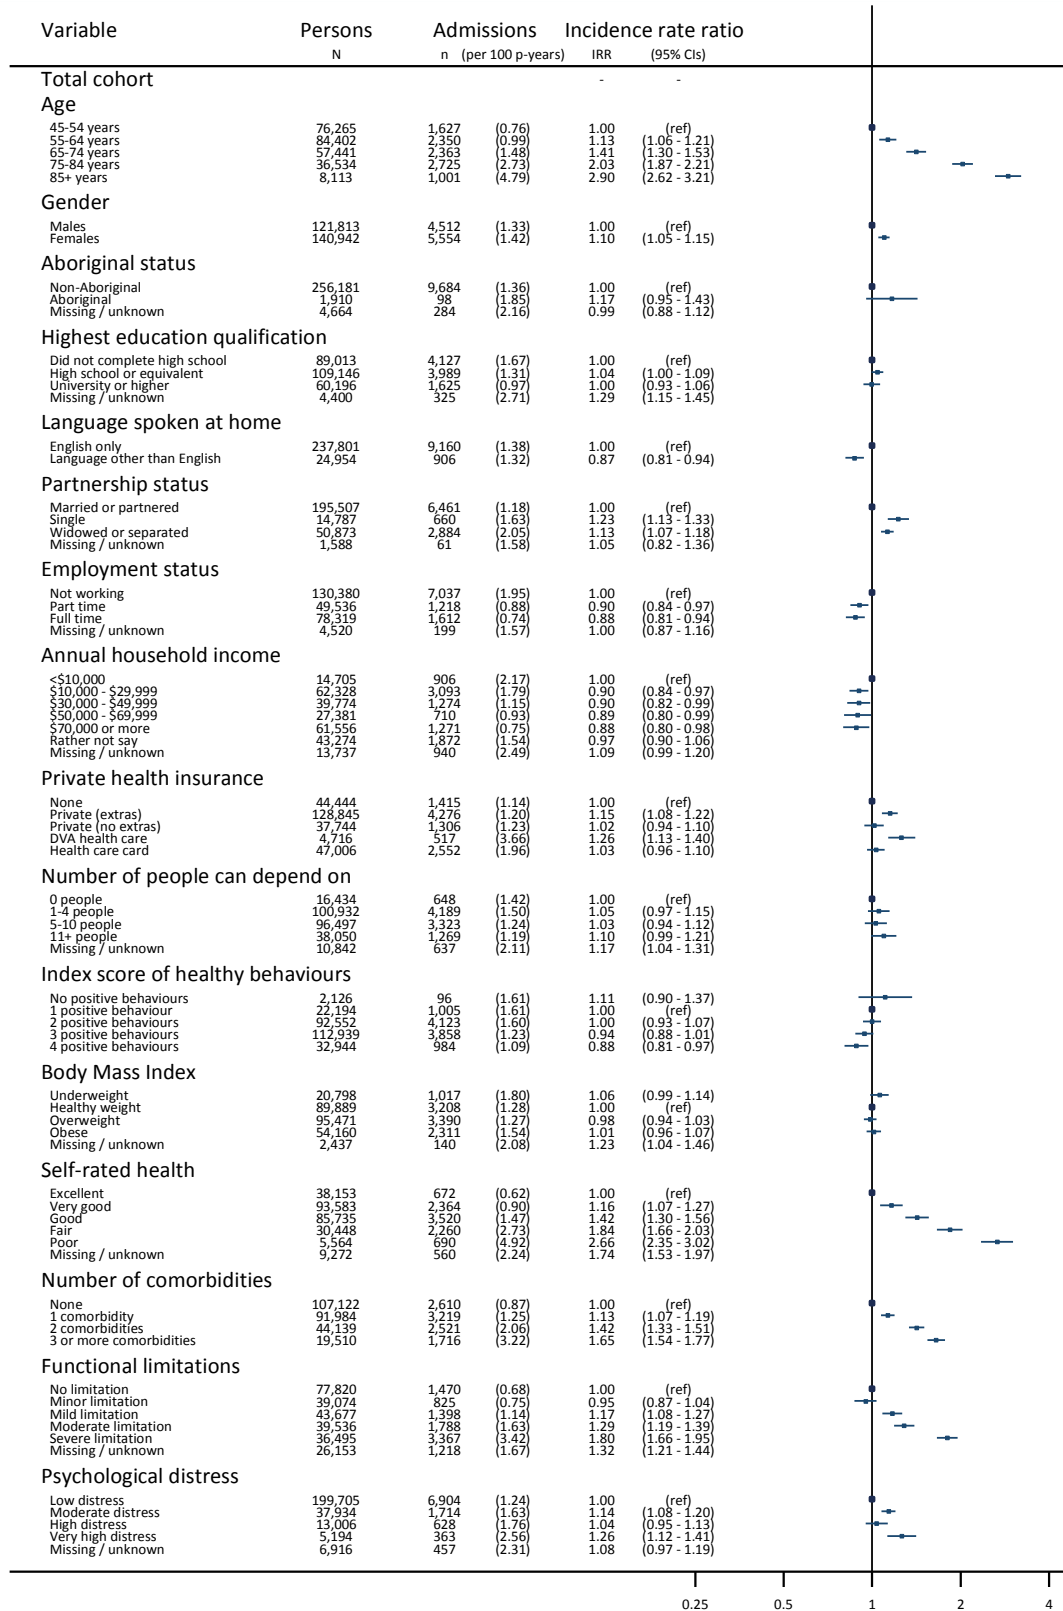

**Supplementary Figure 5: Number of admissions and incidence rate ratios (IRRs) for person-level predictors of vaccine-preventable hospitalisations, in multilevel Poisson models simultaneously adjusted for all person-level variables and area-level quintiles of full time workload equivalent GPs**

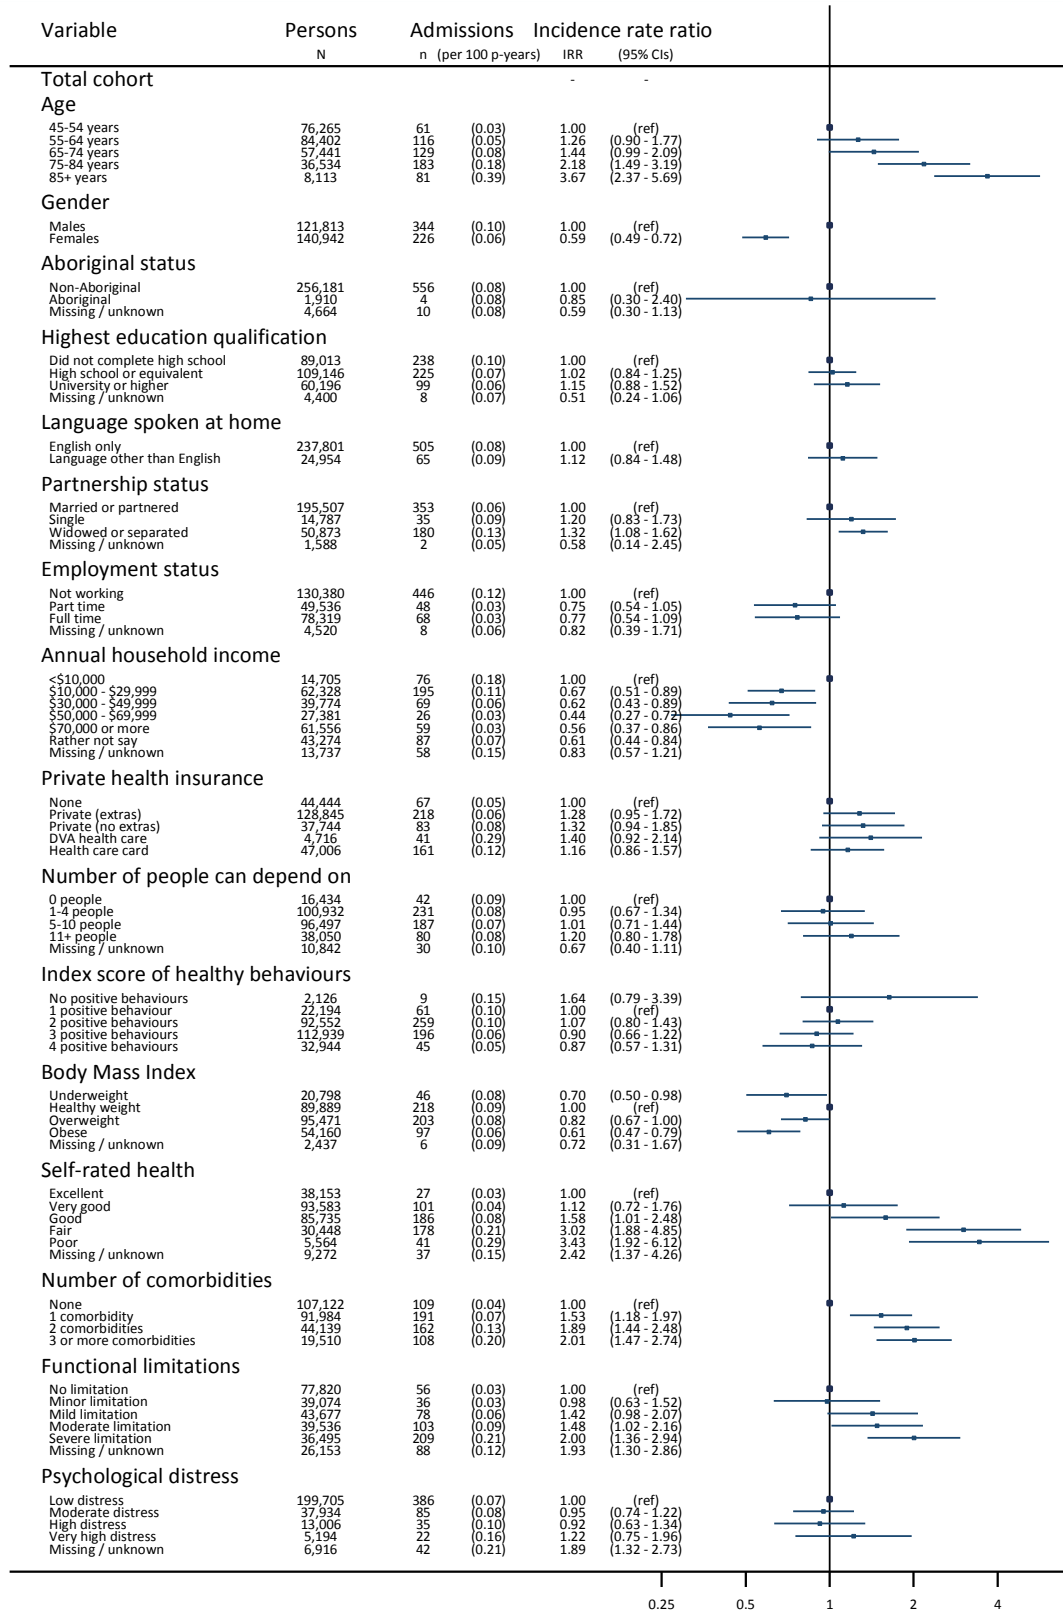

**Supplementary Figure 6: Number of admissions and incidence rate ratios (IRRs) for person-level predictors of 'non-preventable' emergency hospitalisation, in multilevel Poisson models simultaneously adjusted for all person-level variables and area-level quintiles of full time workload equivalent GPs**

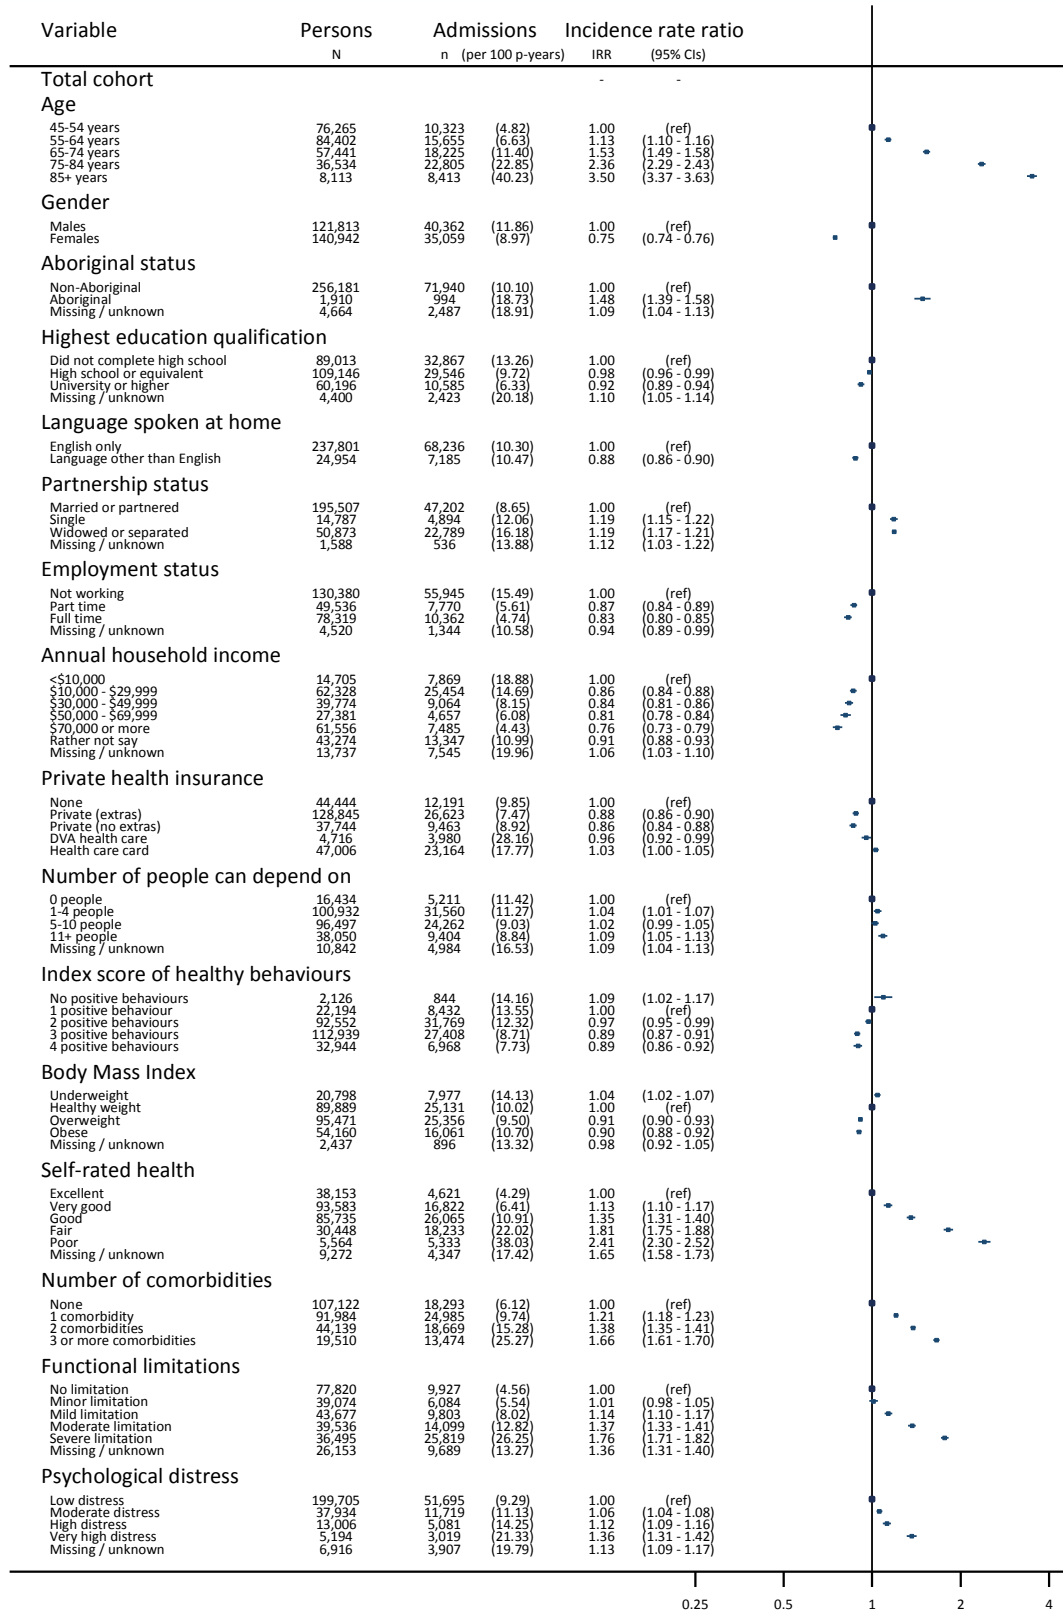

**Supplementary Figure 7: Association between density of full time workload equivalent (FWE) general practitioners (GPs) per capita within Statistical Local Areas, with the rate of preventable and 'non-preventable' hospitalisations, from multilevel Poisson models adjusted for age and sex, and further adjusted for personal socio-demographic, health and behavioural characteristics.**

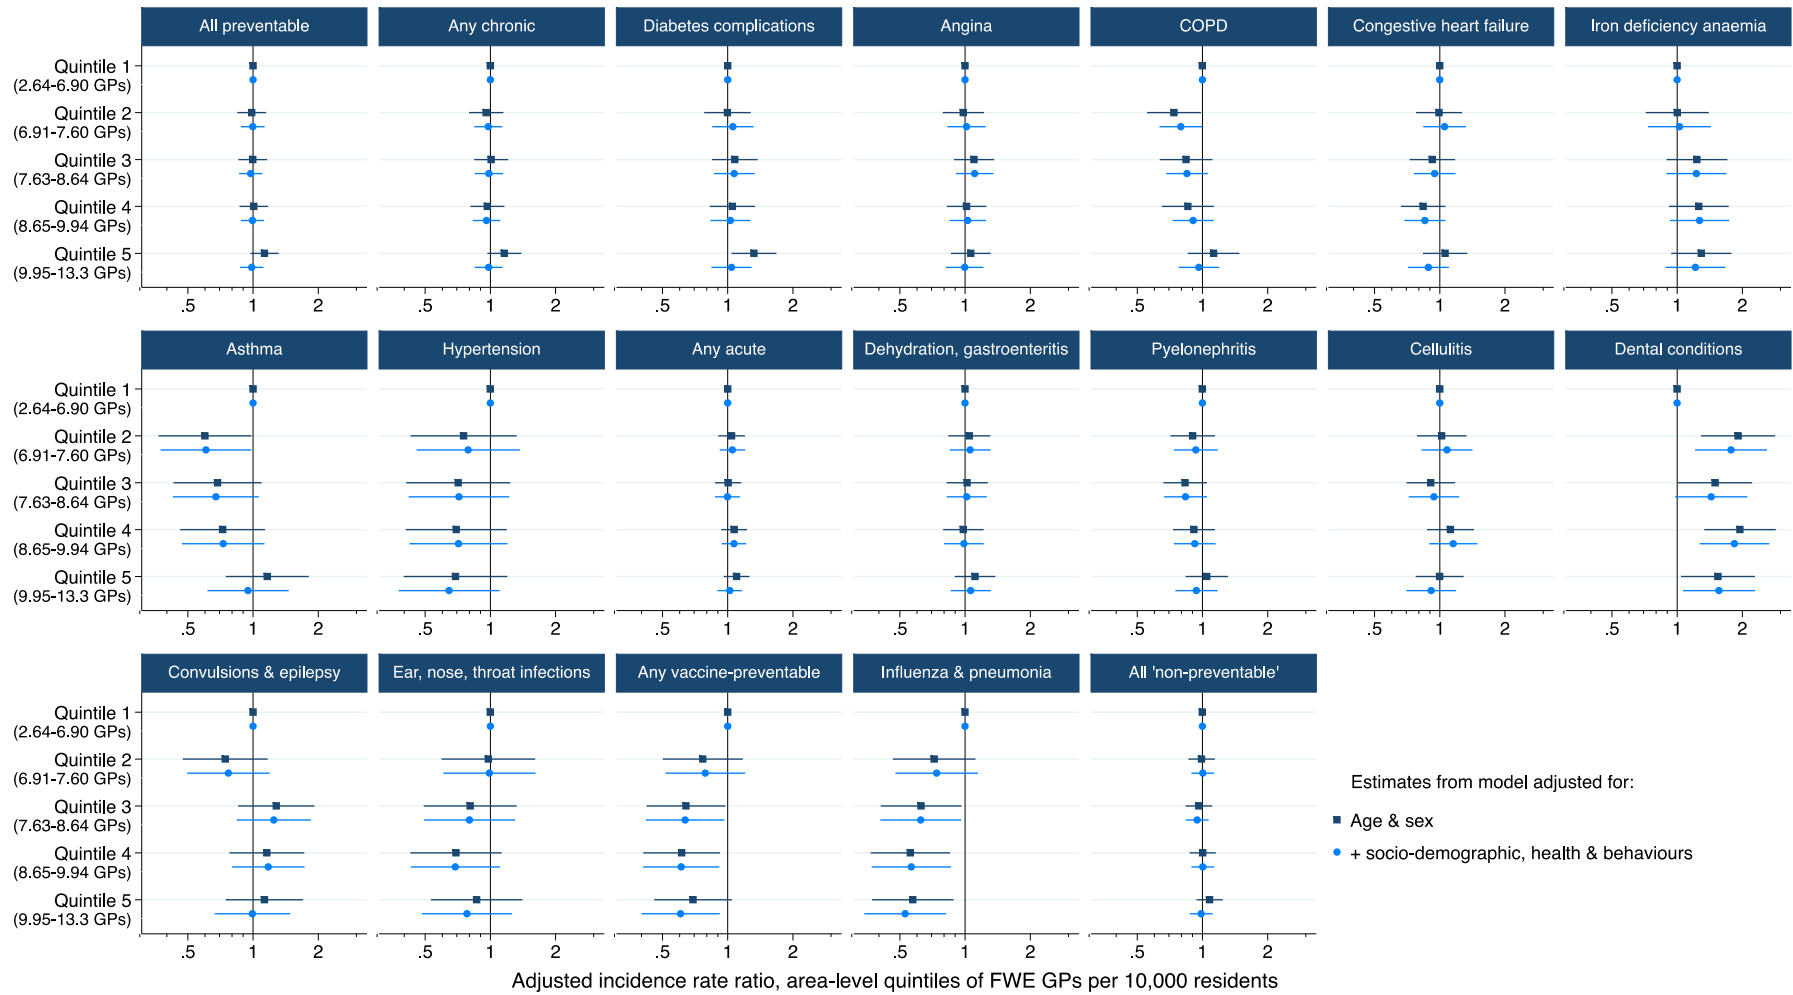

Supplement: mlr-53-436-s001.pdf [file mlr-53-436-s001.pdf]
